# Supplementary material for: Secondary Metabolite Profiling, Antioxidant, Antidiabetic and Neuroprotective Activity of Cestrum nocturnum (Night Scented-Jasmine): Use of In Vitro and In Silico Approach in Determining the Potential Bioactive Compound
Source: MDPI journal article supplement (doi:10.3390/plants12061206), 2023-03-07

## S1: Chromatograms of GC-MS identified compounds (As Listed in Main text of Manuscript)

Hit#:1 Entry:27901 Library:NIST17R.lib

SI:93 Formula:C<sub>16</sub>H<sub>34</sub>O CAS:36653-82-4 MolWeight:242 RetIndex:1854

CompName:1-Hexadecanol \$ n-Cetyl alcohol \$ n-Hexadecan-1-ol \$ n-Hexadecanol \$ Adol 52 \$ Adol 52 NF \$ Adol 54 \$ Aldo

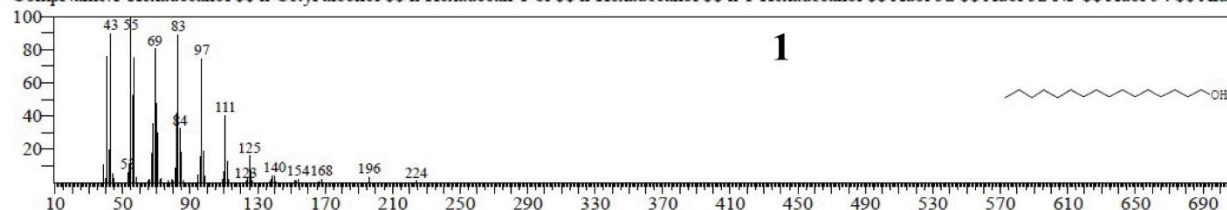

Hit#:1 Entry:9013 Library:NIST17R.lib

SI:65 Formula:C<sub>7</sub>H<sub>7</sub>ClO CAS:623-12-1 MolWeight:142 RetIndex:1049

CompName:Benzenes, 1-chloro-4-methoxy- \$ Anisole, p-chloro- \$ p-Chloroanisole \$ p-Chlorophenyl methyl ether \$ Anis

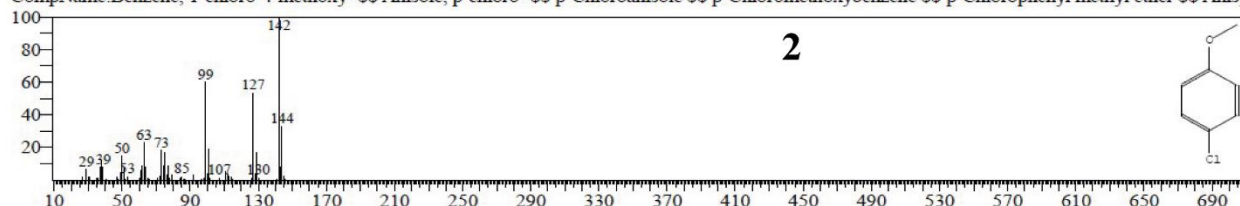

Hit#:1 Entry:7261 Library:NIST17R.lib

SI:75 Formula:C<sub>6</sub>H<sub>14</sub>O<sub>3</sub> CAS:77-99-6 MolWeight:134 RetIndex:1261

CompName:1,3-Propanediol, 2-ethyl-2-(hydroxymethyl)- \$ Ethriol \$ Ethyltrimethylolmethane \$ Ettriol \$ Ettriol \$ Hexaglycerine \$ Propane, 1,1,1-tris

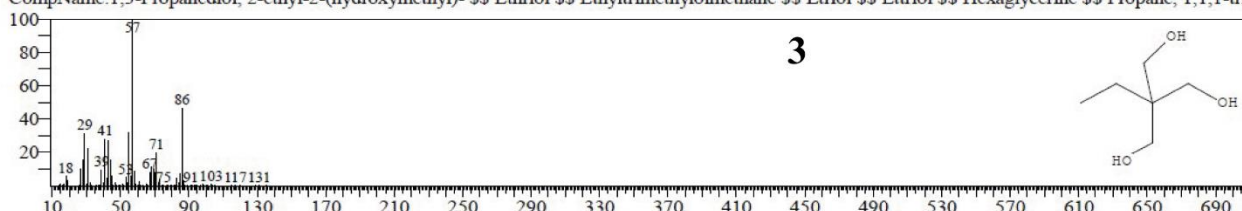

Hit#:1 Entry:22785 Library:NIST17R.lib

SI:96 Formula:C<sub>14</sub>H<sub>22</sub>O CAS:96-76-4 MolWeight:206 RetIndex:1555

CompName:2,4-Di-tert-butylphenol \$ Phenol, 2,4-bis(1,1-dimethylethyl)- \$ Phenol, 2,4-di-tert-butyl- \$ 2,4-di-t-Butylphenol \$ 1-Hydroxy-2,4-di-tert-bu

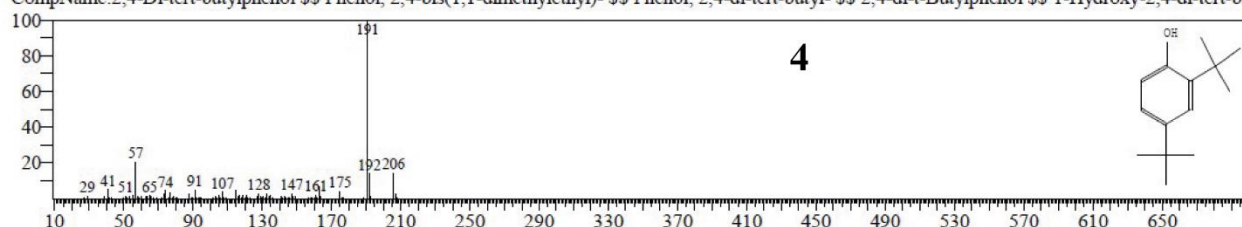

Hit#:1 Entry:29141 Library:NIST17R.lib

SI:66 Formula:C<sub>18</sub>H<sub>38</sub> CAS:13287-23-5 MolWeight:254 RetIndex:1746

CompName:Heptadecane, 8-methyl- \$ 8-Methylheptadecane

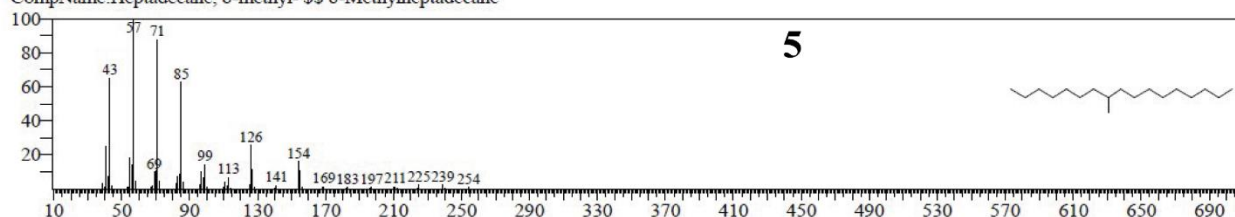

Hit#:1 Entry:19532 Library:NIST17R.lib

SI:70 Formula:C<sub>12</sub>H<sub>14</sub>O<sub>2</sub> CAS:17598-02-6 MolWeight:190 RetIndex:1461

CompName:Precocene I \$ 2H-1-Benzopyran, 7-methoxy-2,2-dimethyl- \$ Demethoxyageratochromene \$ 6-Demethoxyageratochromene \$ 7-Methoxy-2

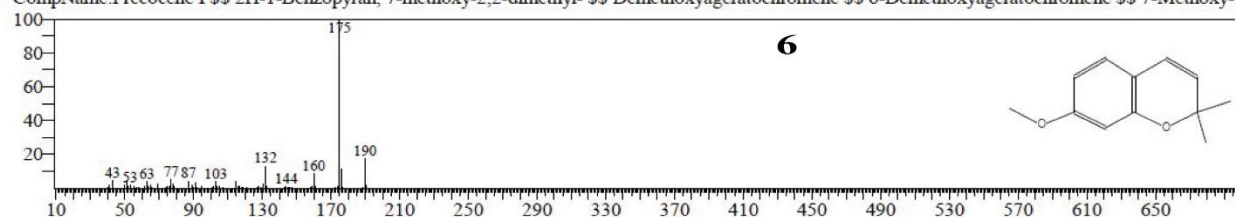

Hit#:1 Entry:10526 Library:NIST17R.lib  
 SI:75 Formula:C5H10O5 CAS:20235-19-2 MolWeight:150 RetIndex:1461  
 CompName:DL-Arabinose \$\$ Pentopyranose #

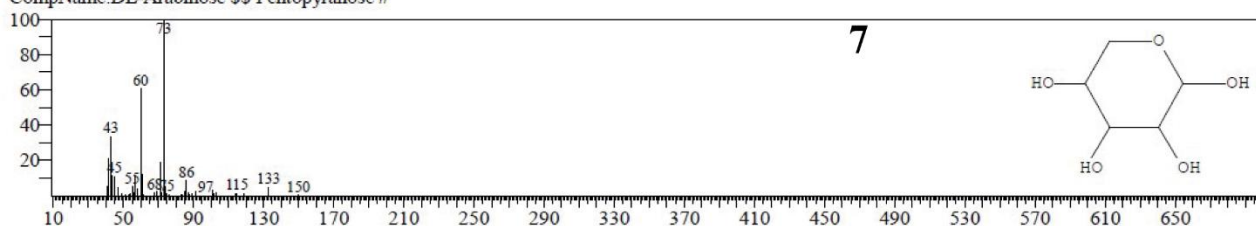

Hit#:1 Entry:34738 Library:NIST17R.lib  
 SI:91 Formula:C22H46O CAS:661-19-8 MolWeight:326 RetIndex:2451  
 CompName:Behenic alcohol \$\$ 1-Docosanol \$\$ Docosyl alcohol \$\$ Docosanol-(1) \$\$ Cachalot BE-22 \$\$ Loxiol VPG 1451 \$\$ Docosan-1-ol \$\$ Behenyl a

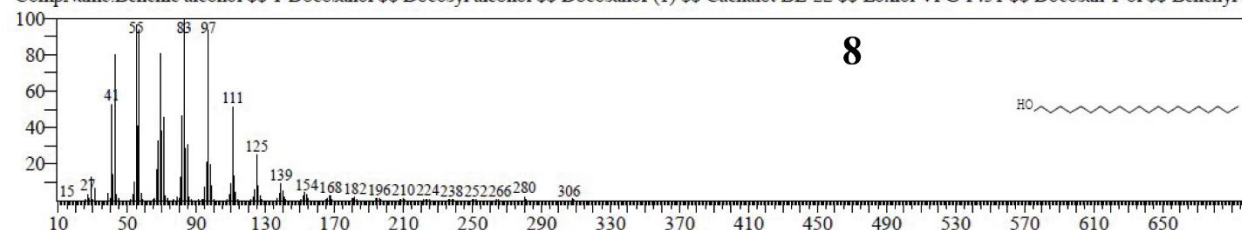

Hit#:1 Entry:31275 Library:NIST17R.lib  
 SI:89 Formula:C16H22O4 CAS:84-69-5 MolWeight:278 RetIndex:1908  
 CompName:1,2-Benzenedicarboxylic acid, bis(2-methylpropyl) ester \$\$ Phthalic acid, diisobutyl ester \$\$ Diisobutyl phthalate \$\$ Hexaplas M/1B \$\$ Isobuty

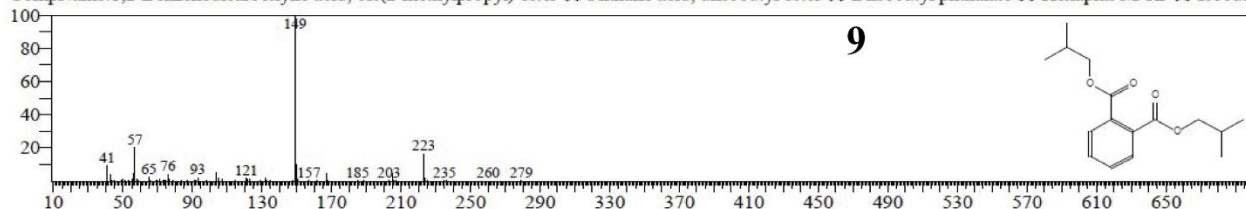

Hit#:1 Entry:31118 Library:NIST17R.lib  
 SI:85 Formula:C17H24O3 CAS:82304-66-3 MolWeight:276 RetIndex:2081  
 CompName:7,9-Di-tert-butyl-1-oxaspiro[4.5]deca-6,9-diene-2,8-dione \$\$ 1-Oxa-spiro[4.5]deca-6,9-diene-2,8-dione, 7,9-di-tert-butyl- \$\$ 7,9-Di-tert-butyl-1

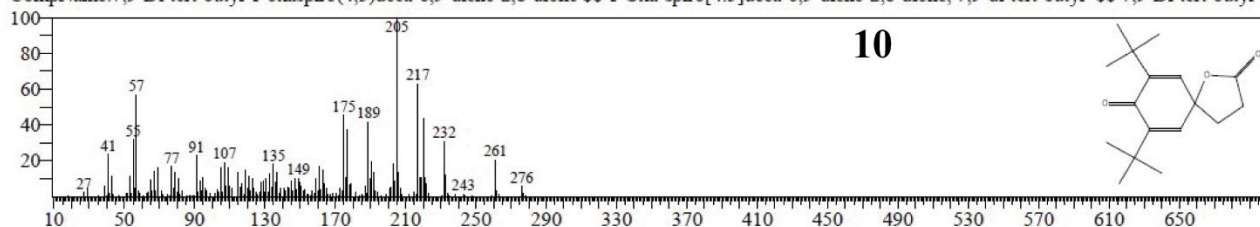

Hit#:1 Entry:30646 Library:NIST17R.lib  
 SI:81 Formula:C17H34O2 CAS:112-39-0 MolWeight:270 RetIndex:1878  
 CompName:Hexadecanoic acid, methyl ester \$\$ Palmitic acid, methyl ester \$\$ n-Hexadecanoic acid methyl ester \$\$ Metholene 2216 \$\$ Methyl hexadecano

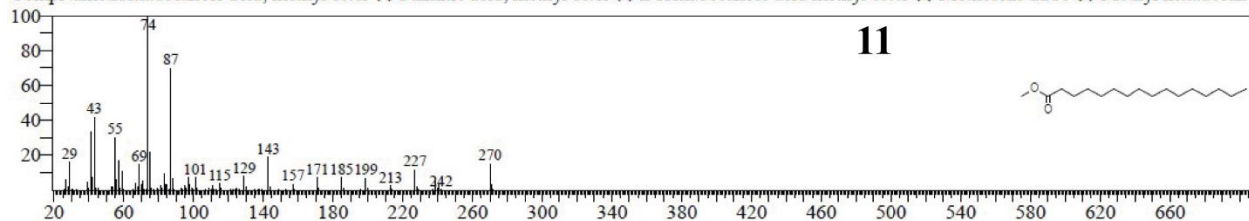

Hit#:1 Entry:32424 Library:NIST17R.lib  
 SI:90 Formula:C18H28O3 CAS:6386-38-5 MolWeight:292 RetIndex:2134  
 CompName:Benzenepropanoic acid, 3,5-bis(1,1-dimethylethyl)-4-hydroxy-, methyl ester \$\$ Methyl 3-(3,5-di-tert-butyl-4-hydroxyphenyl)propionate \$\$ Met

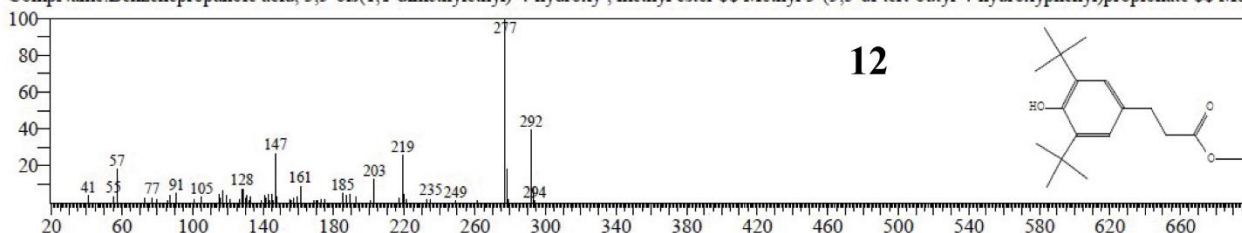



Hit#:1 Entry:31277 Library:NIST17R.lib

SI:94 Formula:C16H22O4 CAS:84-74-2 MolWeight:278 RetIndex:2037

CompName:Dibutyl phthalate \$\$ 1,2-Benzenedicarboxylic acid, dibutyl ester \$\$ Phthalic acid, dibutyl ester \$\$ n-Butyl phthalate \$\$ Butyl phthalate \$\$ Cellu

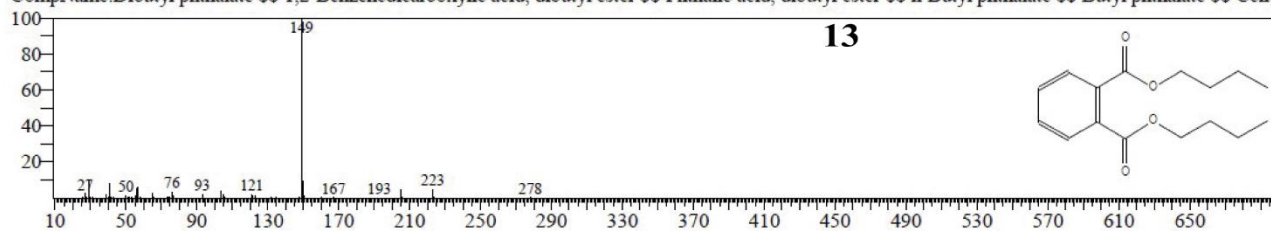

Hit#:1 Entry:34924 Library:NIST17R.lib

SI:56 Formula:C19H38O4 CAS:23470-00-0 MolWeight:330 RetIndex:2498

CompName:Hexadecanoic acid, 2-hydroxy-1-(hydroxymethyl)ethyl ester \$\$ Palmitin, 2-mono- \$\$ Palmitic acid .beta.-monoglyceride \$\$ 2-Hexadecanoyl gl

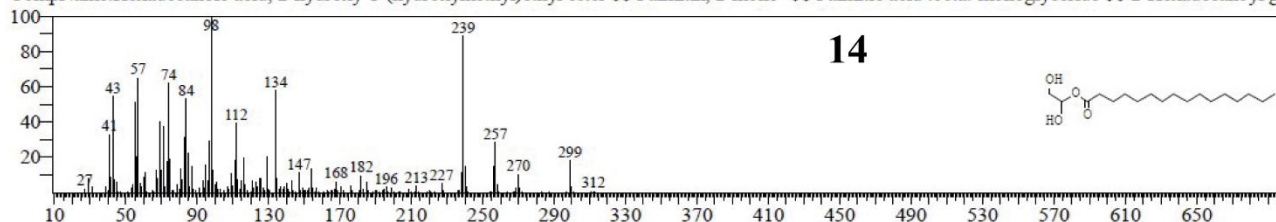

Hit#:1 Entry:3711 Library:NIST17M2.lib

SI:63 Formula:C44H86O3 CAS:55726-23-3 MolWeight:662 RetIndex:4698

CompName:Docosanoic anhydride

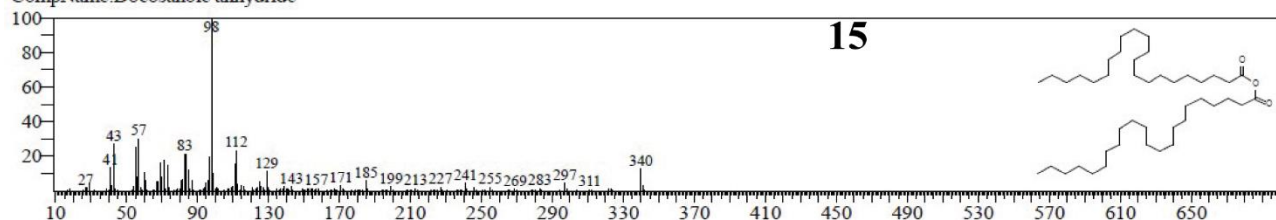

Hit#:1 Entry:36757 Library:NIST17R.lib

SI:61 Formula:C22H42O4 CAS:42235-38-1 MolWeight:370 RetIndex:2543

CompName:Eicosanedioic acid, dimethyl ester \$\$ Dimethyl icosanedioate #

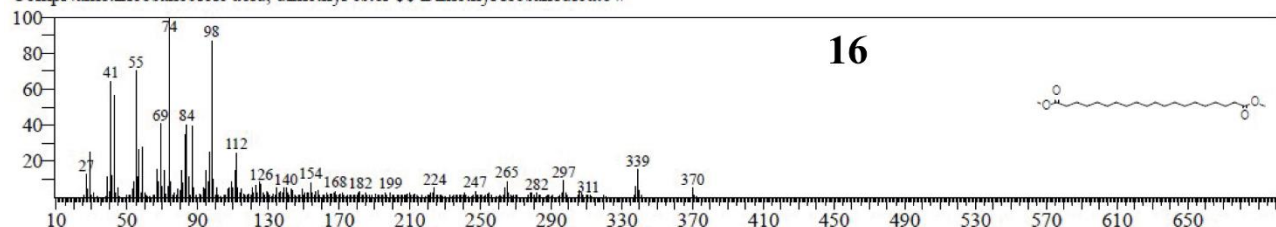

Hit#:1 Entry:3489 Library:NIST17M2.lib

SI:53 Formula:C42H82O4 CAS:0-00-0 MolWeight:650 RetIndex:4531

CompName:Tetracontanedioic acid, dimethyl ester \$\$ Dimethyl tetracontanedioate #

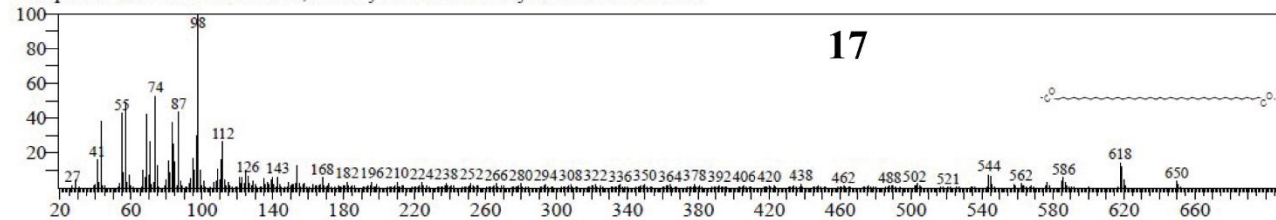

Hit#:1 Entry:35511 Library:NIST17R.lib

SI:46 Formula:C22H44O2 CAS:112-85-6 MolWeight:340 RetIndex:2564

CompName:Docosanoic acid \$\$ n-Docosanoic acid \$\$ Behenic acid \$\$ Glycon B-70 \$\$ Hydrofol Acid 560 \$\$ Hydrofol 2022-55 \$\$ 1-Docosanoic acid \$\$

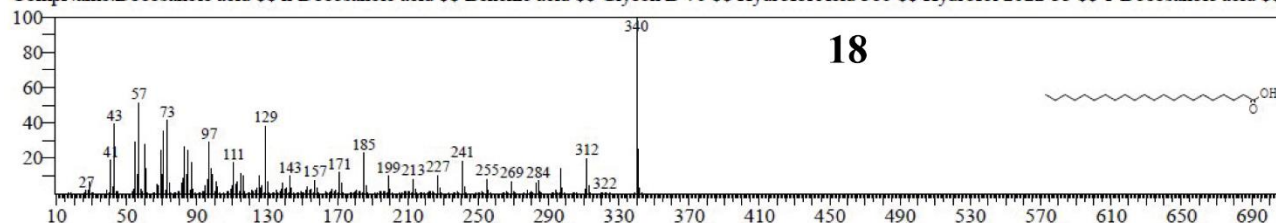

Hit#1 Entry:25526 Library:NIST17R.lib  
 SI:39 Formula:C7H3Cl3O2 CAS:50-43-1 MolWeight:224 RefIndex:1690  
 CompName:Benzoic acid, 2,4,6-trichloro- \$\$ 2,4,6-Trichlorobenzoic acid

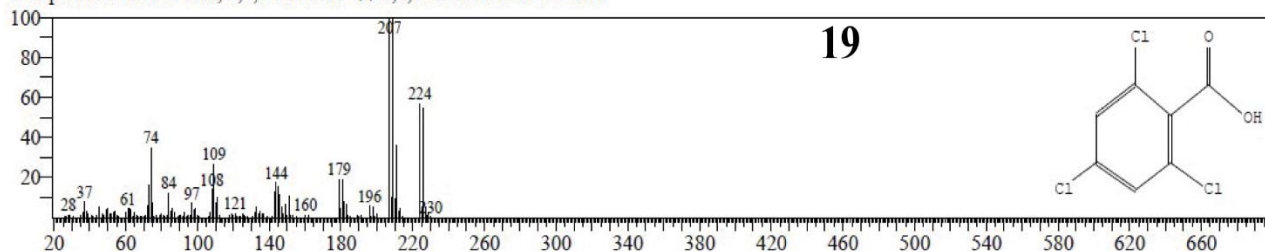

Hit#1 Entry:2493 Library:NIST17M2.lib  
 SI:36 Formula:C24H24Br2F4O4 CAS:0-00-0 MolWeight:610 RefIndex:3434  
 CompName:Sebacic acid, di(4-bromo-2,6-difluorobenzyl) ester

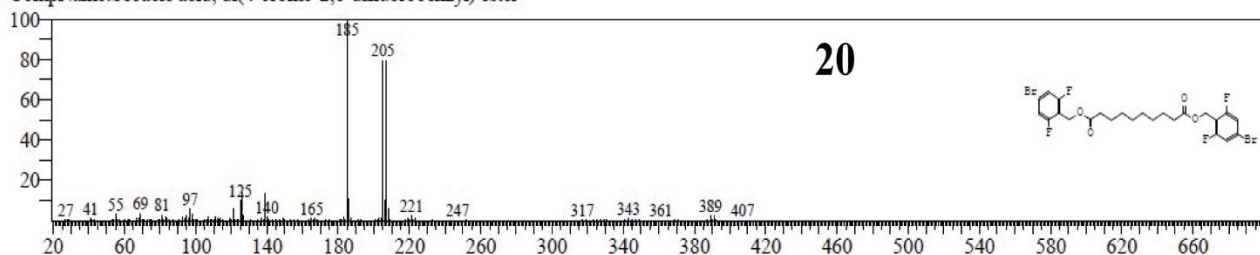

Hit#1 Entry:38707 Library:NIST17R.lib  
 SI:38 Formula:C32H58OSi CAS:2625-46-9 MolWeight:486 RefIndex:2789  
 CompName:.beta.-Sitosterol, TMS derivative \$\$ .beta.-Sitosterol trimethylsilyl ether \$\$ Silane, trimethyl[[[(3.beta.)-stigmast-5-en-3-yl]oxy]- \$\$ Silane, trime

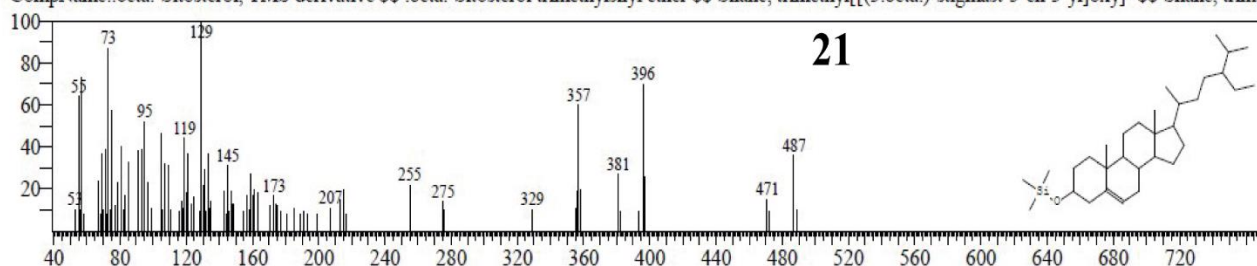

Hit#1 Entry:3710 Library:NIST17M2.lib  
 SI:48 Formula:C42H63O4P CAS:95906-11-9 MolWeight:662 RefIndex:0  
 CompName:Tris(2,4-di-tert-butylphenyl) phosphate \$\$ Phenol, 2,4-bis(1,1-dimethylethyl)-, 1,1',1''-phosphate \$\$ Phenol, 2,4-bis(1,1-dimethylethyl)-, phosph

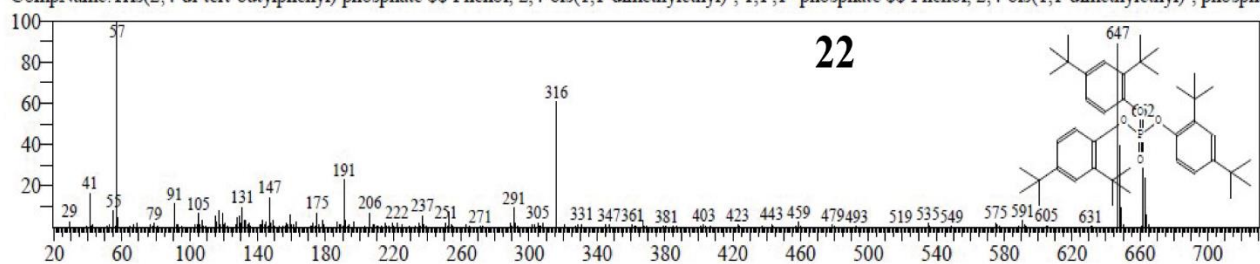

Hit#1 Entry:36773 Library:NIST17R.lib  
 SI:38 Formula:C23H46O3 CAS:38646-51-4 MolWeight:370 RefIndex:2717  
 CompName:Methyl 22-hydroxydocosanoate \$\$ Methyl .omega.-hydroxydocosanoate \$\$ Docosanoic acid, 22-hydroxy-, methyl ester

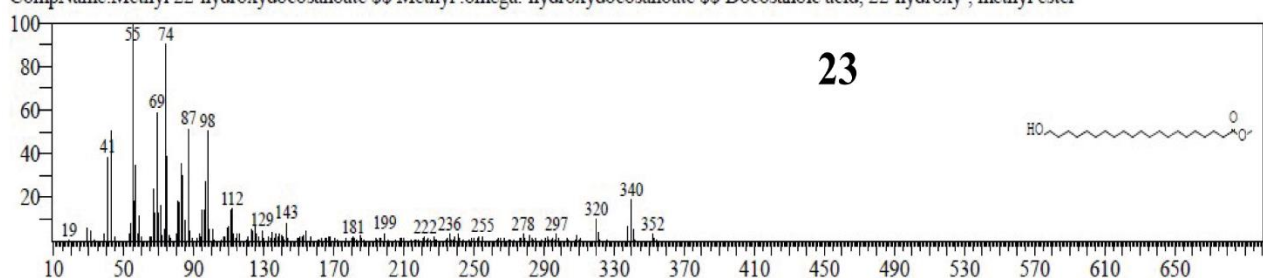

Supplement: s1 [file s1]
